# Supplementary material for: Preoperative Transthoracic Echocardiography in Laparoscopic Colorectal Surgery: Impact on Postoperative Cardiac Outcomes
Source: Research Square preprint supplement (doi:10.21203/rs.3.rs-5653634/v1), 2025-01-01
Supplement: Supplementary file 1 [file 2024c16237e4d6ea52b474d4.docx]

Supplement Information Table 1 Characteristics of included patients

|  | Without TTE (N=82) | With TTE (N=967) | χ2/t | P-value |
| --- | --- | --- | --- | --- |
| Gender |  |  |  |  |
| Male | 54 | 613 |  |  |
| Female | 28 | 354 | 0.198 | 0.656 |
| Age( years) | 57.50±13.230 | 59.32±11.648 | 1.208 | 0.230 |
| BMI | 23.04±4.296 | 22.99±3.344 | 0.130 | 0.897 |
| Previous hypertension |  |  |  |  |
| No | 63 | 717 |  |  |
| Yes | 19 | 250 | 0.285 | 0.593 |
| Previous ischemic heart disease |  |  |  |  |
| No | 80 | 941 |  |  |
| Yes | 2 | 23 | 0.001 | 0.976 |
| Previous cerebrovascular disease |  |  |  |  |
| No | 80 | 947 |  |  |
| Yes | 2 | 20 | 0.051 | 0.822 |
| Previous diabetes |  |  |  |  |
| No | 69 | 858 |  |  |
| Yes | 13 | 109 | 1.544 | 0.214 |
| ASA classification |  |  |  |  |
| 1 | 12 | 85 |  |  |
| 2 | 62 | 808 |  |  |
| 3 | 8 | 74 | 3.795 | 0.150 |
| Hb (g/L) | 128.91±21.872 | 130.15±20.715 | 0.517 | 0.606 |
| ALB (g/L) | 41.355±4.505 | 41.714±4.027 | 0.769 | 0.442 |
| Ccr (mL/min) | 74.71±29.440 | 72.78±22.106 | 0.737 | 0.461 |
| Postoperative MACEs |  |  |  |  |
| No | 79 | 926 |  |  |
| Yes | 3 | 41 | 0.064 | 0.801 |
| Hospitalization days | 21.80±9.474 | 22.91±9.861 | 0.980 | 0.327 |
| Hospitalization expenses (RMB, in thousands) | 33.78±2.14 | 33.84±2.26 | 0.745 | 0.453 |
